# Supplementary material for: Effects of Slurry Reflux on the Stability and Microbial Community Structure of Corn Stalk Anaerobic Digestion System
Source: Research Square preprint supplement (doi:10.21203/rs.3.rs-623948/v2), 2021-10-13
Supplement: Supplementary file 1 [file f45b2d7dcdb0aa1d6762eee0.xlsx]

## Sheet: Sheet1
Alpha diversity index of microbial community during anaerobic digestion process
	Sequence	Coverage	OTU	Ace	Chao	Shannon
Bacteria
R1-1	50509	0.99	1227	1494.53	1406.35	4.59
R1-3	58538	1	1133	1386.81	1332.3	4.54
R2-1	55398	1	1284	1468.03	1414.02	4.55
R2-2	43665	0.99	1105	1434.84	1357.67	4.55
R2-3	22254	0.98	1116	1992.3	1514.35	4.26
R2-4	40155	0.99	1354	1705.42	1543.5	3.98
Archaea
R1-1	35502	1	141	271.08	220.5	1.59
R1-3	72156	1	219	420.89	304	2.21
R2-1	66784	1	150	294.22	211.22	1.63
R2-2	79634	1	159	234.75	209.32	1.92
R2-3	59710	1	108	273.6	174	1.95
R2-4	66585	1	212	356.38	277.54	2.02

## Sheet: Sheet2
Variation of microbial communities structure
Bacteria
	Bacteroidetes	Verrucomicrobia	Firmicutes	Chloroflexi	Proteobacteria	Synergistetes	unclassified	others
R1-1	26.87	0.01	36.24	1.07	26.92	0.22	2.34	6.33
R1-3	18.46	8.34	32.83	15.16	2.51	5.74	4.2	12.76
R2-1	29.14	2.67	23.35	15.76	17.61	2.98	2.72	5.77
R2-2	18.07	3.36	21.48	23.07	20.49	3.4	3.05	7.08
R2-3	23.27	8.41	21.12	26.45	8.54	2.3	4.89	5.02
R2-4	32.41	24.2	14.57	12.54	3.12	0.79	5.03	7.34
Archaea
Phylum
	Euryarchaeota	Crenarchaeota	unclassified	others
R1-1	89.32	10.63	0.04	0.01
R1-3	87.62	12.36	0.02	0
R2-1	71.83	27.99	0.12	0.06
R2-2	66.7	33.26	0.02	0.02
R2-3	63.53	36.43	0.03	0.01
R2-4	83.69	16.07	0.07	0.17
Genus
	Methanothrix	unclassified	Methanospirillum	Methanobacterium	Methanosphaerula	Methanomassiliicoccus	Methanosarcina	Others
R1-1	58.24	10.67	0.04	24.62	4.87	0.26	0.94	0.36
R1-3	15.34	12.55	43.01	23.07	1.22	0.75	3.18	0.88
R2-1	53.44	28.16	0.84	1.88	13.5	0.95	0.83	0.4
R2-2	45.16	33.46	3.37	1.14	13.5	3.09	0.18	0.1
R2-3	38.76	36.47	9.02	2.6	2.85	9.67	0.15	0.48
R2-4	41.75	16.2	18.93	6.35	2.85	13.26	0.26	0.4
